# Supplementary material
Source: PubMed Central journal article supplement (PMC9017132)
Supplement: mmc1.pdf [file mmc1.pdf]

**Cell Reports Methods, Volume 1**

**Supplemental information**

**Double-jeopardy: scRNA-seq**

**doublet/multiplier detection**

**using multi-omic profiling**

**Bo Sun, Emmanuel Bugarin-Estrada, Lauren Elizabeth Overend, Catherine Elizabeth Walker, Felicia Anna Tucci, and Rachael Jennifer Mary Bashford-Rogers**

## Supplementary tables

**Table S1.** The numbers of doublets/multiplets doublets by VDJ-seq and CITE-seq per sample. Related to Figure 2.

|                                         | Doublet type                    | By sample   |             |              | By gene expression type |                           |             |              |            |                        |            |
|-----------------------------------------|---------------------------------|-------------|-------------|--------------|-------------------------|---------------------------|-------------|--------------|------------|------------------------|------------|
|                                         |                                 | HC 1        | HC 2        | HC 3         | B cells                 | Monocytes/<br>neutrophils | NK          | T cells      | mDCs       | non-conv.<br>monocytes | pDCs       |
| Identified<br>by VDJ-seq                | IGH+IGK/L+TRA<br>or TRB         | 0           | 1           | 2            | 3                       | 0                         | 0           | 0            | 0          | 0                      | 0          |
|                                         | 3 of<br>[IGH,IGK/L,TRA,T<br>RB] | 18          | 19          | 43           | 79                      | 1                         | 0           | 0            | 0          | 0                      | 0          |
|                                         | IGH or IGK/L +<br>TRA or TRB    | 22          | 23          | 54           | 95                      | 1                         | 0           | 3            | 0          | 0                      | 0          |
|                                         | 2x IGHs                         | 54          | 12          | 29           | 93                      | 2                         | 0           | 0            | 0          | 0                      | 0          |
|                                         | 2x IGK/L                        | 111         | 43          | 59           | 205                     | 6                         | 0           | 1            | 0          | 0                      | 1          |
|                                         | 2x TRBs                         | 9           | 16          | 34           | 0                       | 0                         | 1           | 57           | 0          | 1                      | 0          |
|                                         | 2x IGH and 2x<br>IGK/L          | 27          | 9           | 20           | 56                      | 0                         | 0           | 0            | 0          | 0                      | 0          |
|                                         | 2x TRAs and 2x<br>TRBs          | 0           | 0           | 0            | 0                       | 0                         | 0           | 0            | 0          | 0                      | 0          |
|                                         | non-B cell<br>clustered + BCR   | 66          | 34          | 57           | 0                       | 114                       | 3           | 20           | 4          | 12                     | 4          |
|                                         | non-T cell<br>clustered + TCR   | 48          | 120         | 221          | 100                     | 112                       | 138         | 0            | 11         | 27                     | 1          |
| <b>Total identified<br/>by VDJ-seq</b>  | <b>253</b>                      | <b>210</b>  | <b>372</b>  | <b>333</b>   | <b>225</b>              | <b>141</b>                | <b>77</b>   | <b>15</b>    | <b>39</b>  | <b>5</b>               |            |
| Identified<br>by CITE-<br>seq           | CD127:CD16                      | 95          | 118         | 283          | 16                      | 110                       | 262         | 26           | 1          | 81                     | 0          |
|                                         | CD19:CD127                      | 274         | 203         | 274          | 595                     | 103                       | 4           | 42           | 0          | 6                      | 1          |
|                                         | CD19:CD14                       | 92          | 40          | 71           | 16                      | 162                       | 3           | 13           | 1          | 6                      | 2          |
|                                         | CD19:CD16                       | 46          | 34          | 53           | 48                      | 53                        | 6           | 11           | 0          | 15                     | 0          |
|                                         | CD19:CD3                        | 124         | 91          | 170          | 285                     | 51                        | 3           | 44           | 0          | 1                      | 1          |
|                                         | CD19:CD4                        | 185         | 90          | 179          | 232                     | 166                       | 3           | 33           | 3          | 12                     | 5          |
|                                         | CD19:CD56                       | 38          | 46          | 51           | 64                      | 46                        | 6           | 17           | 0          | 2                      | 0          |
|                                         | CD19:CD8a                       | 62          | 40          | 72           | 91                      | 46                        | 4           | 31           | 0          | 2                      | 0          |
|                                         | CD4:CD16                        | 348         | 278         | 483          | 10                      | 257                       | 192         | 32           | 8          | 607                    | 3          |
| <b>Total identified<br/>by CITE-seq</b> | <b>684</b>                      | <b>517</b>  | <b>867</b>  | <b>690</b>   | <b>382</b>              | <b>289</b>                | <b>76</b>   | <b>11</b>    | <b>612</b> | <b>8</b>               |            |
| Identified<br>by<br>MLtiplet            | VDJ-seq training<br>set         | 227         | 190         | 374          | 248                     | 256                       | 142         | 78           | 20         | 42                     | 5          |
|                                         | CITE-seq<br>training set        | 775         | 562         | 995          | 821                     | 431                       | 300         | 87           | 16         | 669                    | 8          |
|                                         | DF training set                 | 782         | 377         | 1124         | 393                     | 585                       | 173         | 222          | 358        | 398                    | 154        |
|                                         | <b>Total droplets</b>           | <b>7674</b> | <b>7024</b> | <b>11382</b> | <b>2982</b>             | <b>5346</b>               | <b>2461</b> | <b>13964</b> | <b>420</b> | <b>749</b>             | <b>158</b> |

**Table S2.** The number of predicted doublets using different doublet training sets for the healthy PBMC dataset. Related to Figure 2.

| Training set                              | Number of droplets used in training set | Total doublets predicted | Total doublets predicted per sample |      |      | Total doublets predicted per cluster |              |      |         |      |                |      |
|-------------------------------------------|-----------------------------------------|--------------------------|-------------------------------------|------|------|--------------------------------------|--------------|------|---------|------|----------------|------|
|                                           |                                         |                          | HC 1                                | HC2  | HC3  | B cells                              | Mono / neuts | NK   | T cells | mDCs | non-conv. Mono | pDCs |
| VDJ-training.0.2x                         | 139                                     | 435                      | 142                                 | 105  | 188  | 289                                  | 82           | 10   | 5       | 3    | 40             | 6    |
| VDJ-training.0.4x                         | 278                                     | 640                      | 209                                 | 165  | 266  | 423                                  | 123          | 16   | 18      | 28   | 29             | 3    |
| VDJ-training.0.6x                         | 416                                     | 843                      | 263                                 | 218  | 362  | 535                                  | 167          | 48   | 36      | 22   | 27             | 8    |
| VDJ-training.0.8x                         | 555                                     | 1037                     | 321                                 | 261  | 455  | 601                                  | 194          | 77   | 60      | 26   | 62             | 17   |
| VDJ-training.1x                           | 693                                     | 1219                     | 371                                 | 309  | 539  | 736                                  | 221          | 98   | 73      | 27   | 53             | 11   |
| CITE-training.0.2x                        | 414                                     | 1891                     | 595                                 | 455  | 841  | 1090                                 | 127          | 33   | 9       | 3    | 628            | 1    |
| CITE-training.0.4x                        | 828                                     | 2912                     | 918                                 | 710  | 1284 | 1634                                 | 192          | 407  | 14      | 12   | 650            | 3    |
| CITE-training.0.6x                        | 1241                                    | 3671                     | 1198                                | 907  | 1566 | 2035                                 | 264          | 647  | 26      | 17   | 678            | 4    |
| CITE-training.0.8x                        | 1655                                    | 4079                     | 1351                                | 1035 | 1693 | 2385                                 | 328          | 634  | 32      | 17   | 679            | 4    |
| CITE-training.1x                          | 2068                                    | 4817                     | 1561                                | 1245 | 2011 | 2541                                 | 428          | 1083 | 56      | 21   | 684            | 4    |
| DoubletFinder-training.0.2x               | 408                                     | 1374                     | 453                                 | 318  | 603  | 260                                  | 175          | 6    | 3       | 257  | 521            | 152  |
| DoubletFinder-training.0.4x               | 816                                     | 2021                     | 723                                 | 456  | 842  | 551                                  | 361          | 87   | 10      | 308  | 553            | 151  |
| DoubletFinder-training.0.6x               | 1224                                    | 2751                     | 963                                 | 635  | 1153 | 889                                  | 518          | 261  | 24      | 331  | 575            | 153  |
| DoubletFinder-training.0.8x               | 1632                                    | 3596                     | 1245                                | 853  | 1498 | 1143                                 | 678          | 626  | 41      | 342  | 611            | 155  |
| DoubletFinder-training.1x                 | 2040                                    | 4499                     | 1521                                | 1088 | 1890 | 1515                                 | 904          | 878  | 66      | 356  | 625            | 155  |
| VDJ & CITE-training.0.2x                  | 463                                     | 1772                     | 551                                 | 415  | 806  | 943                                  | 150          | 10   | 5       | 18   | 642            | 4    |
| VDJ & CITE-training.0.4x                  | 926                                     | 2348                     | 728                                 | 578  | 1042 | 1353                                 | 234          | 69   | 19      | 23   | 646            | 4    |
| VDJ & CITE-training.0.6x                  | 1389                                    | 3293                     | 1069                                | 812  | 1412 | 1885                                 | 356          | 289  | 29      | 61   | 663            | 10   |
| VDJ & CITE-training.0.8x                  | 1852                                    | 3947                     | 1324                                | 987  | 1636 | 2250                                 | 429          | 495  | 49      | 50   | 667            | 7    |
| VDJ & CITE-training.1x                    | 2314                                    | 4705                     | 1559                                | 1181 | 1965 | 2475                                 | 569          | 816  | 90      | 73   | 674            | 8    |
| VDJ, CITE & DoubletFinder-training.0.2x   | 702                                     | 2222                     | 755                                 | 512  | 955  | 784                                  | 288          | 134  | 11      | 240  | 613            | 152  |
| VDJ, CITE & DoubletFinder-training.0.4x   | 1403                                    | 3844                     | 1335                                | 911  | 1598 | 1588                                 | 502          | 623  | 33      | 291  | 653            | 154  |
| VDJ, CITE & DoubletFinder-training.0.6x   | 2104                                    | 5462                     | 1799                                | 1384 | 2279 | 2154                                 | 769          | 1313 | 76      | 326  | 670            | 154  |
| VDJ, CITE & DoubletFinder-training.0.8x   | 2805                                    | 6589                     | 2201                                | 1689 | 2699 | 2603                                 | 1118         | 1554 | 131     | 343  | 686            | 154  |
| VDJ, CITE & DoubletFinder-training.1x     | 3506                                    | 7453                     | 2531                                | 1896 | 3026 | 2788                                 | 1496         | 1772 | 187     | 365  | 691            | 154  |
| VDJ-training.HC_103                       | 139                                     | 570                      | 325                                 | 96   | 149  | 433                                  | 114          | 2    | 7       | 2    | 11             | 1    |
| VDJ-training.HC_104                       | 278                                     | 439                      | 120                                 | 125  | 194  | 219                                  | 83           | 41   | 21      | 15   | 56             | 4    |
| VDJ-training.HC_105                       | 416                                     | 596                      | 113                                 | 177  | 306  | 302                                  | 113          | 76   | 30      | 21   | 32             | 22   |
| CITE-training.HC_103                      | 414                                     | 2283                     | 877                                 | 511  | 895  | 1463                                 | 197          | 8    | 6       | 2    | 606            | 1    |
| CITE-training.HC_104                      | 828                                     | 2080                     | 642                                 | 517  | 921  | 1127                                 | 162          | 99   | 16      | 13   | 658            | 5    |
| CITE-training.HC_105                      | 1241                                    | 3390                     | 873                                 | 840  | 1677 | 1532                                 | 148          | 1002 | 39      | 9    | 655            | 5    |
| DoubletFinder-training.HC_103             | 408                                     | 895                      | 565                                 | 107  | 223  | 226                                  | 200          | 63   | 18      | 241  | 60             | 87   |
| DoubletFinder-training.HC_104             | 816                                     | 1056                     | 301                                 | 246  | 509  | 82                                   | 183          | 4    | 20      | 305  | 314            | 148  |
| DoubletFinder-training.HC_105             | 1224                                    | 1667                     | 353                                 | 452  | 862  | 456                                  | 365          | 32   | 25      | 297  | 341            | 151  |
| VDJ & CITE-training.HC_103                | 463                                     | 2334                     | 900                                 | 518  | 916  | 1479                                 | 227          | 6    | 5       | 2    | 614            | 1    |
| VDJ & CITE-training.HC_104                | 926                                     | 1970                     | 604                                 | 493  | 873  | 1018                                 | 176          | 71   | 18      | 29   | 654            | 4    |
| VDJ & CITE-training.HC_105                | 1389                                    | 2746                     | 758                                 | 661  | 1327 | 1243                                 | 214          | 570  | 37      | 25   | 649            | 8    |
| VDJ, CITE & DoubletFinder-training.HC_103 | 702                                     | 2445                     | 902                                 | 564  | 979  | 1102                                 | 401          | 14   | 18      | 253  | 541            | 116  |
| VDJ, CITE & DoubletFinder-training.HC_104 | 1403                                    | 2213                     | 723                                 | 534  | 956  | 837                                  | 279          | 38   | 31      | 242  | 643            | 143  |
| VDJ, CITE & DoubletFinder-training.HC_105 | 2104                                    | 2930                     | 880                                 | 703  | 1347 | 1065                                 | 475          | 260  | 54      | 300  | 635            | 141  |

Abbreviations:

**VDJ-seq.*ax*** (where  $a = 0.2, 0.4, 0.6, 0.8, 1.0$ ) refers to VDJ-identified doublets in the training set with the proportion  $a$  randomly subsampled.

**CITE-seq. $a$**  refers to CITE-identified doublets in the training set with the proportion  $a$  randomly subsampled.

**VDJ&CITE-seq. $a$**  refers to VDJ and CITE-identified doublets in the training set with the proportion  $a$  randomly subsampled.

**VDJ, CITE & DoubletFinder-training. $a$**  refers to VDJ, CITE-seq and DoubletFinder-identified doublets in the training set with the proportion  $a$  randomly subsampled.

**METHOD.Sample $X$**  (where  $X = 1, 2, 3$  and *METHOD* = VDJ-seq., CITE-seq, VDJ&CITE-seq, VDJ, CITE & DoubletFinder-training) refers to the identified doublets in via the corresponding method for the the training set from only healthy PBMC sample  $X$ .

**Table S3.** The number of total droplets, and identified doublets/multiplets with different methods, and predicted doublets using different doublet training sets for the NSCLC dataset. Related to Figure 4.

|                                              |                     | B cell      | connective tissue | DC         | epithelia   | Granulocyte | mono./mac. | NK cell    | plasma cell | T cell      | Unknown   |
|----------------------------------------------|---------------------|-------------|-------------------|------------|-------------|-------------|------------|------------|-------------|-------------|-----------|
|                                              | <b>All droplets</b> | <b>2327</b> | <b>20</b>         | <b>154</b> | <b>1149</b> | <b>148</b>  | <b>782</b> | <b>140</b> | <b>147</b>  | <b>1813</b> | <b>48</b> |
| <b>MLtiplet training doublets/multiplets</b> | VDJ training        | 26          | 0                 | 23         | 19          | 2           | 18         | 4          | 8           | 65          | 3         |
|                                              | DF training         | 9           | 0                 | 0          | 0           | 1           | 4          | 7          | 0           | 43          | 3         |
|                                              | VDJ DF training     | 33          | 0                 | 23         | 19          | 3           | 22         | 7          | 8           | 75          | 6         |
| <b>MLtiplet predictions</b>                  | VDJ predicted       | 3           | 0                 | 4          | 4           | 0           | 2          | 2          | 4           | 16          | 2         |
|                                              | DF predicted        | 7           | 0                 | 1          | 0           | 1           | 0          | 3          | 0           | 19          | 2         |
|                                              | VDJ DF predicted    | 3           | 0                 | 5          | 4           | 1           | 2          | 2          | 5           | 20          | 2         |

## Supplementary figures

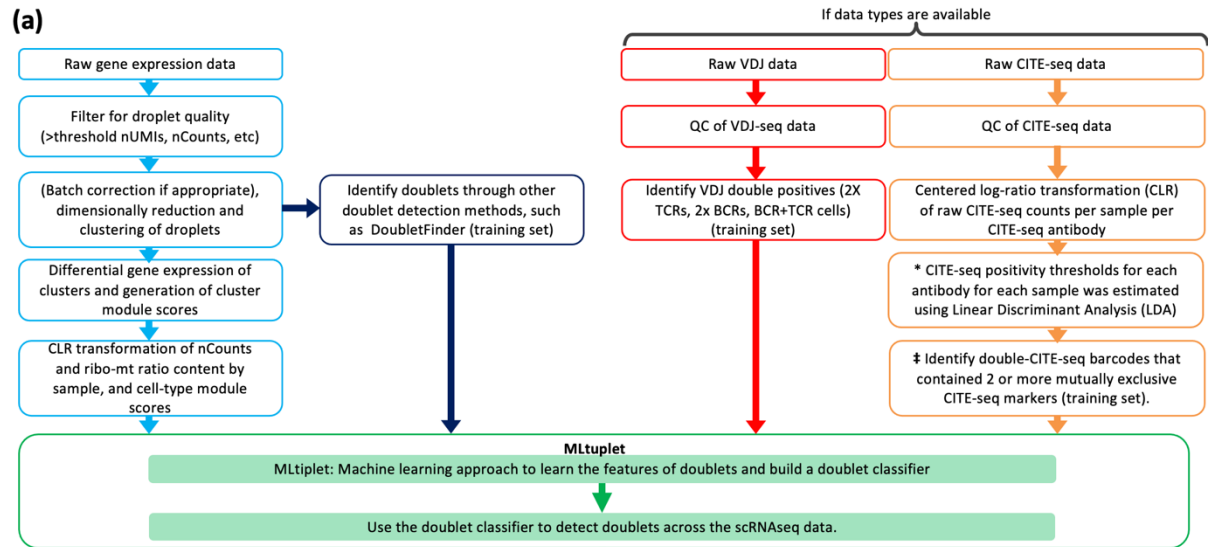

‡ From a pre-generated list of mutually exclusive CITE-seq markers

Doublet/multiplet-excluded gene expression data, VDJ data and/or CITE-seq data

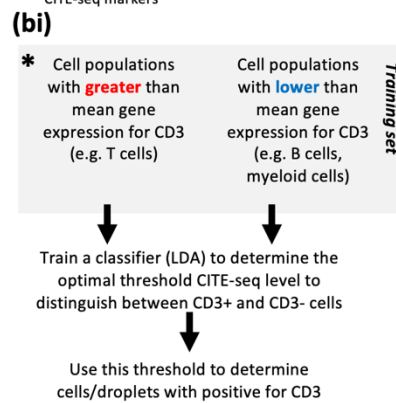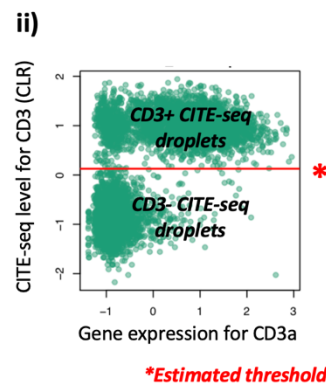

**iii)**

| CITE_seq For HC1 | CITE_seq For HC2-3   | Gene_name |
|------------------|----------------------|-----------|
| CD127_TotalSeqC  | CD127_A019D5_TotalC  | IL7R      |
| CD14_TotalSeqC   | CD14_M5E2_TotalC     | CD14      |
| CD16_TotalSeqC   | CD16_3G8_TotalC      | FCGR3A    |
| CD19_TotalSeqC   | CD19_H1B19_TotalC    | CD19      |
| CD25_TotalSeqC   | CD25_BC96_TotalC     | IL2RA     |
| CD4_TotalSeqC    | CD4_RPA-T4_TotalC    | CD4       |
| CD45RA_TotalSeqC | CD45RA_HI100_TotalC  | PTPRC     |
| CD56_TotalSeqC   | CD56_QA17A16_TotalC  | NCAM1     |
| CD8a_TotalSeqC   | CD8a_RPA-T8_TotalC   | CD8A      |
| PD-1_TotalSeqC   | PD-1_EH12.2H7_TotalC | PDCD1     |
| TIGIT_TotalSeqC  | TIGIT_A15153G_TotalC | TIGIT     |
| CD15_TotalSeqC   | CD15_W6D3_TotalC     | FUT4      |
| CD3_TotalSeqC    | CD3_UCHT1_TotalC     | CD3D      |
| CD45RO_TotalSeqC | CD45RO_UCHL1_TotalC  | PTPRC     |

**(c)**

| Sample             | HC 1  | HC 2  | HC 3  |
|--------------------|-------|-------|-------|
| B cells            | 14.7  | 10.18 | 10.01 |
| Mono./neut.s       | 31.76 | 16.51 | 15.37 |
| NK                 | 4.86  | 10.99 | 11.56 |
| T cells            | 42.9  | 57.83 | 58.07 |
| mDCs               | 1.84  | 1.38  | 1.6   |
| non-conv. monocyte | 3.06  | 2.66  | 2.87  |
| pDCs               | 0.89  | 0.44  | 0.52  |

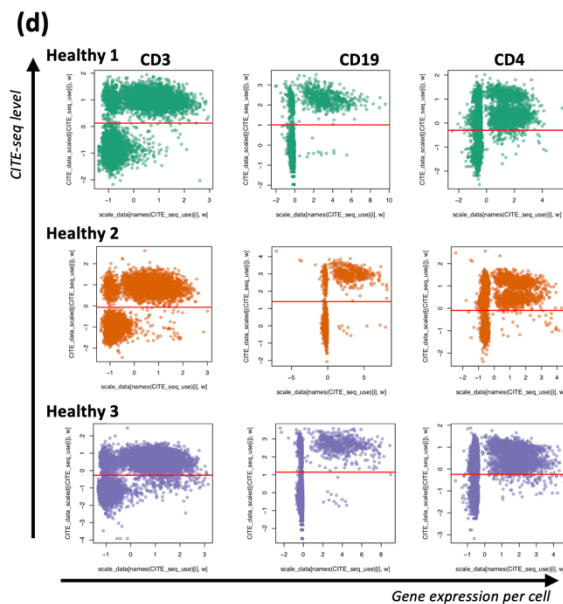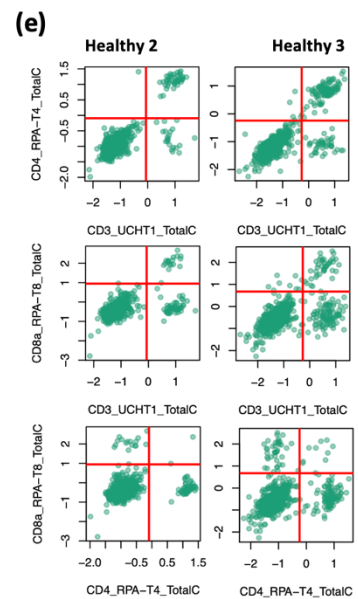

**Figure S1. Workflow of MLtiplet doublet/multiplet detection using VDJ-seq and CITE-seq modalities. Related to Figure 1.**

(a) Schematic of MLtiplet doublet detection workflow. (bi) Detailed explanation of step CITE-seq positivity thresholds for each antibody for each sample (marked by a \* in (a)) using CD3 as an example. For each CITE-seq antibody, the normalised CITE-seq levels between cell populations with high corresponding gene expression (such as T cells for CD3, bii) and low gene expression (such as B cells and myeloid cells) were the input into a linear classifier to determine the optimal threshold for distinguishing the CD3 CITE-seq positive and CD3 CITE-seq negative cells/droplets. Each cell/droplet is then classified to determine whether they are positive (CD3 CITE-seq level greater than threshold) or negative (CD3 CITE-seq level lower than threshold). This is performed for each CITE-seq antibody. (biii) The available CITE-seq probes from the peripheral blood mononuclear cells (PBMCs) from three healthy individuals (<https://support.10xgenomics.com/single-cell-vdj/datasets>). (c) The percentages of each broad immune cell type per sample annotated through differential gene expression and CITE-seq marker expression. (d) Examples of the CITE-seq thresholds set per patient for CITE-seq antibodies targeting CD3, CD19 and CD4. (e) Examples of the CITE-seq levels between CD3, CD4 and CD8 for the healthy individuals 2 and 3 for the B cell cluster, with the red lines corresponding to the CITE-seq positivity thresholds. The equivalent plot for healthy individual 1 is provided in Figure 1.

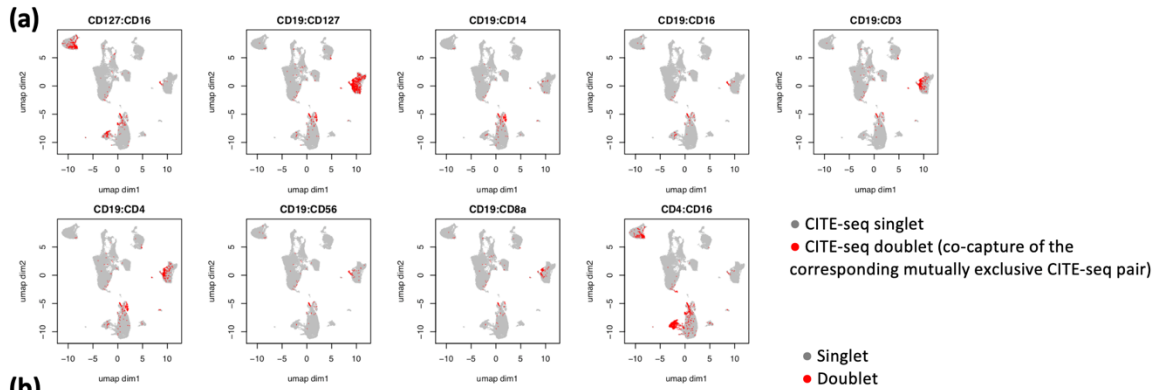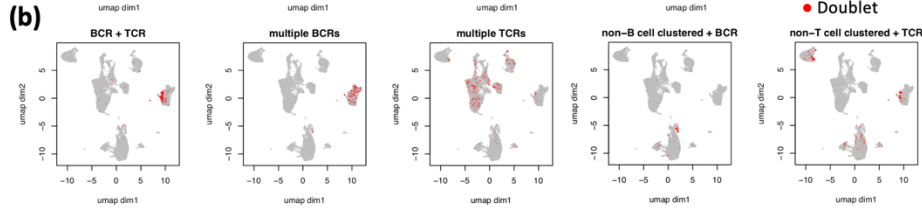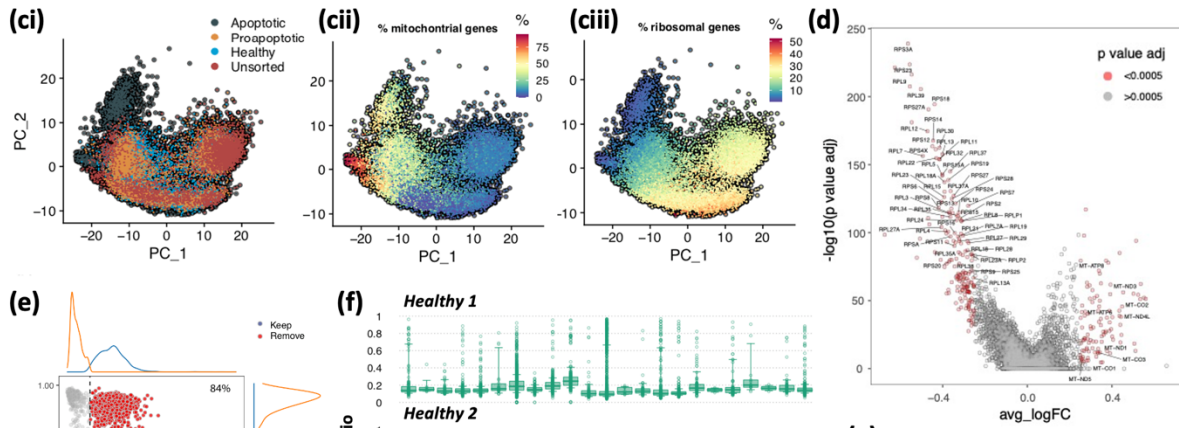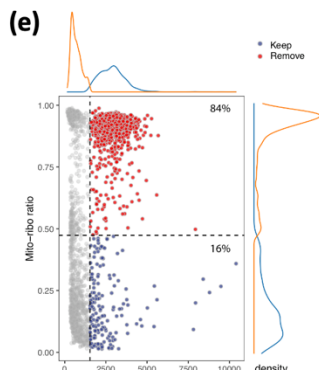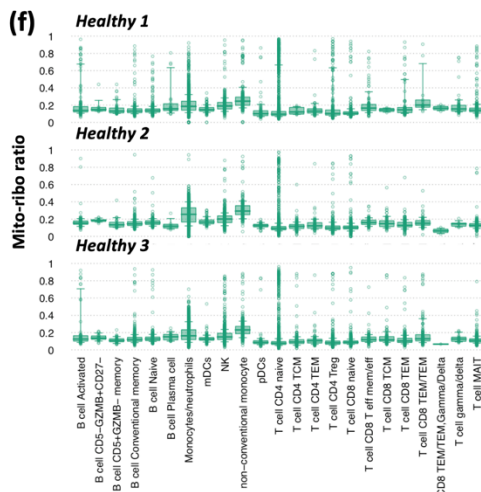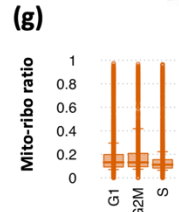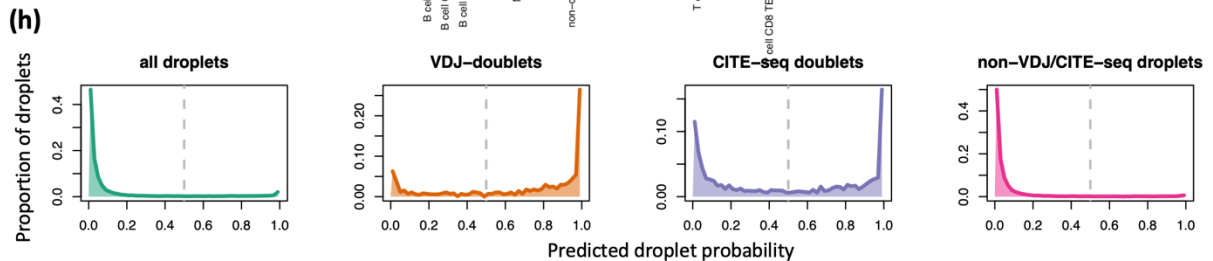



**Figure S2. Doublet/multiplet detection using VDJ-seq and CITE-seq modalities in human healthy PBMCs and MLtiplet training features.**

**Related to Figure 1.**

(a) The UMAP distributions of the CITE-seq doublet droplets (red) and remainder droplets (grey). (b) The UMAP distributions of the BCR/TCR doublet droplets (red) and remainder droplets (grey). (c) PCA plot of HEK293 cells enriched for apoptotic, proapoptotic, healthy and unsorted populations. (cii) PCA coloured by percentage mitochondrial gene counts of total gene counts. (ciii) PCA coloured by percentage ribosomal gene counts of total gene counts. (d) Differential gene expression analysis between apoptotic and healthy single cells. (e) Mito-ribo ratio vs. total number of genes detected with corresponding density plots. Inferred doublets assigned to be removed are highlighted in red. Percentages shown are calculated on all cells above the local minimum of a GMM fitted on total genes detected, represented by the dotted vertical line. The mito-ribo ratios for each droplet across (f) cell types and (g) cell cycle phases per healthy PBMC sample (as defined by gene expression). (h) Histogram of doublet prediction probabilities by MLtiplet for (from left to right) all droplets, doublets/multiplets identified by VDJ-seq, doublets/multiplets identified by CITE-seq, and droplets that were not identified as doublets/multiplets identified by VDJ-seq or CITE-seq.

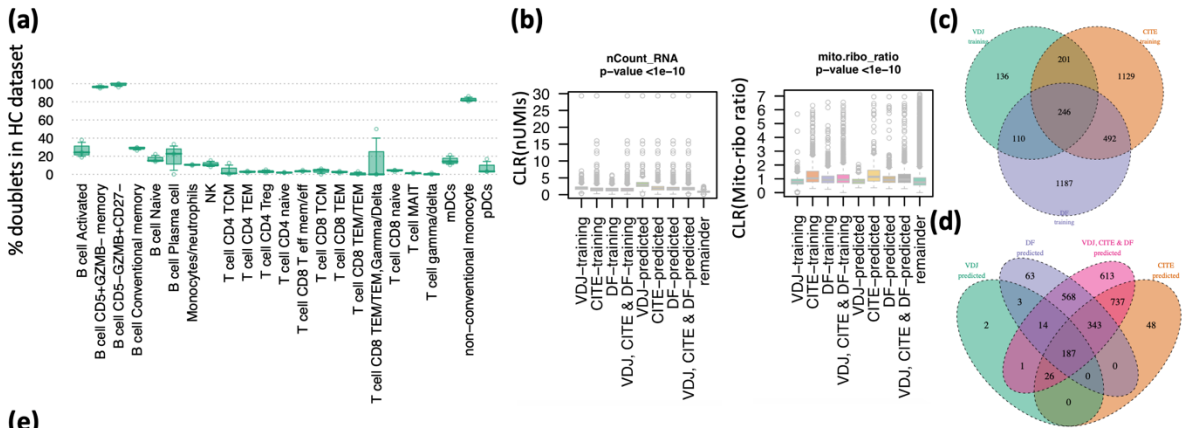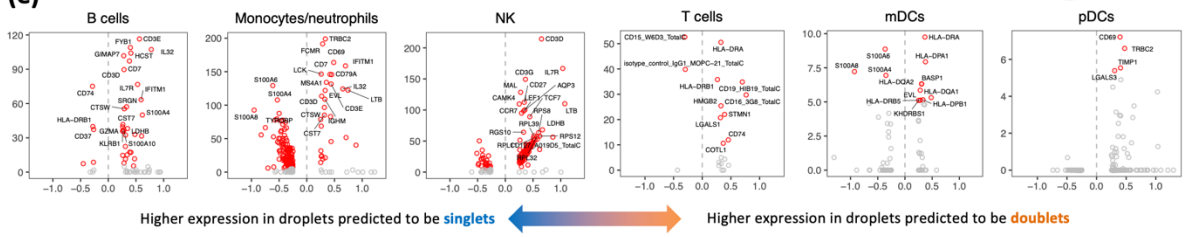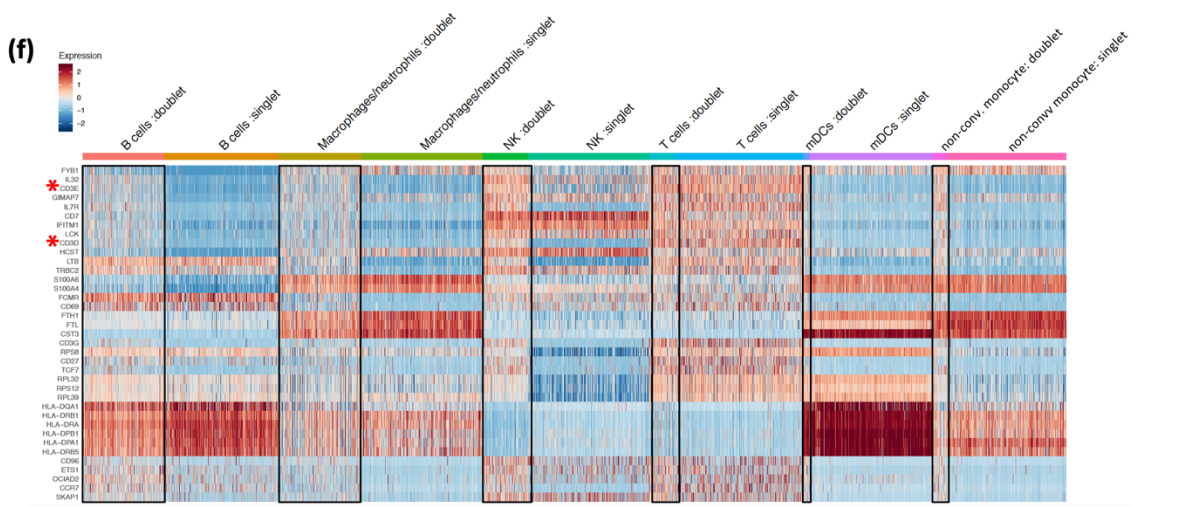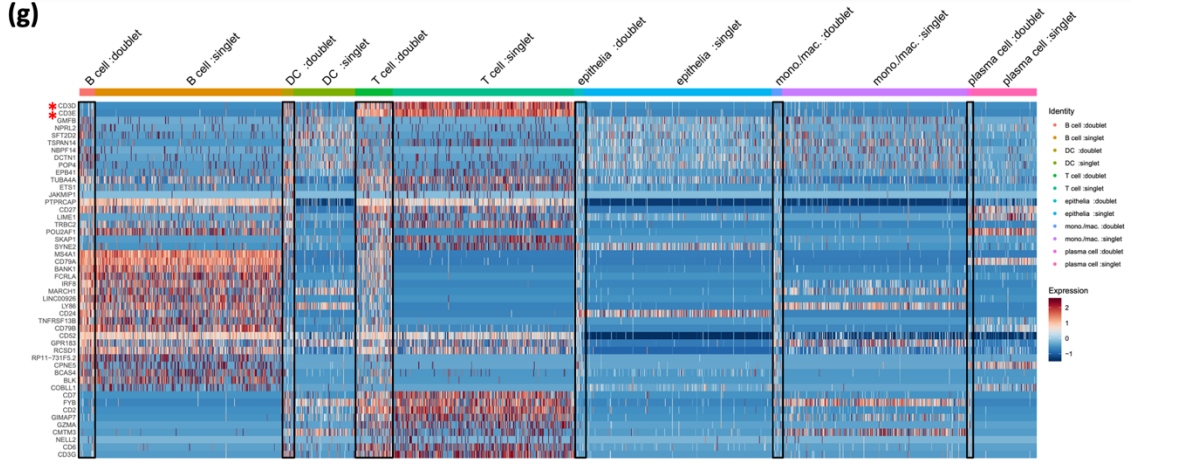

**Figure S3. Features of training and predicted doublet/multiplet sets.**

**Related to Figure 2.**

(a) Percentages of predicted doublets by MLtuplet per cell annotation in healthy scRNA-seq dataset. (b) The relative numbers of RNA molecules (nUMI) and mito-ribo ratio (mitoribo\_ratio) per droplet for the VDJ-identified doublets/multiplets, the CITE-seq-identified and DoubletFinder (DF)-identified doublets/multiplets (training) and the resulting predicted doublets/multiplets derived from these training datasets using MLtuplet. “Remainder” refers to droplets that were not identified/predicted to be doublets/multiplets from the VDJ-seq or CITE-seq data. The p-values of the differences between the feature distributions of the doublet/multiplets detected and the remainder of the droplets provided (two-sided Wilcoxon test). Venn diagrams of the numbers of droplets in (c) each training set by method, and (d) predicted from MLtuplet using each training set. (e) Volcano plots of the differential gene expression between droplets predicted to be doublets/multiplets compared to those predicted to be singlets per UMAP cluster. The top 20 genes with a p-value  $<1e5$  are labelled. (f) Heatmap of differential gene expression between healthy PBMC between predicted singlets and doublets/multiplets per cell type cluster. (g) Heatmap of differential gene expression between predicted singlets and doublets/multiplets per cell type cluster.

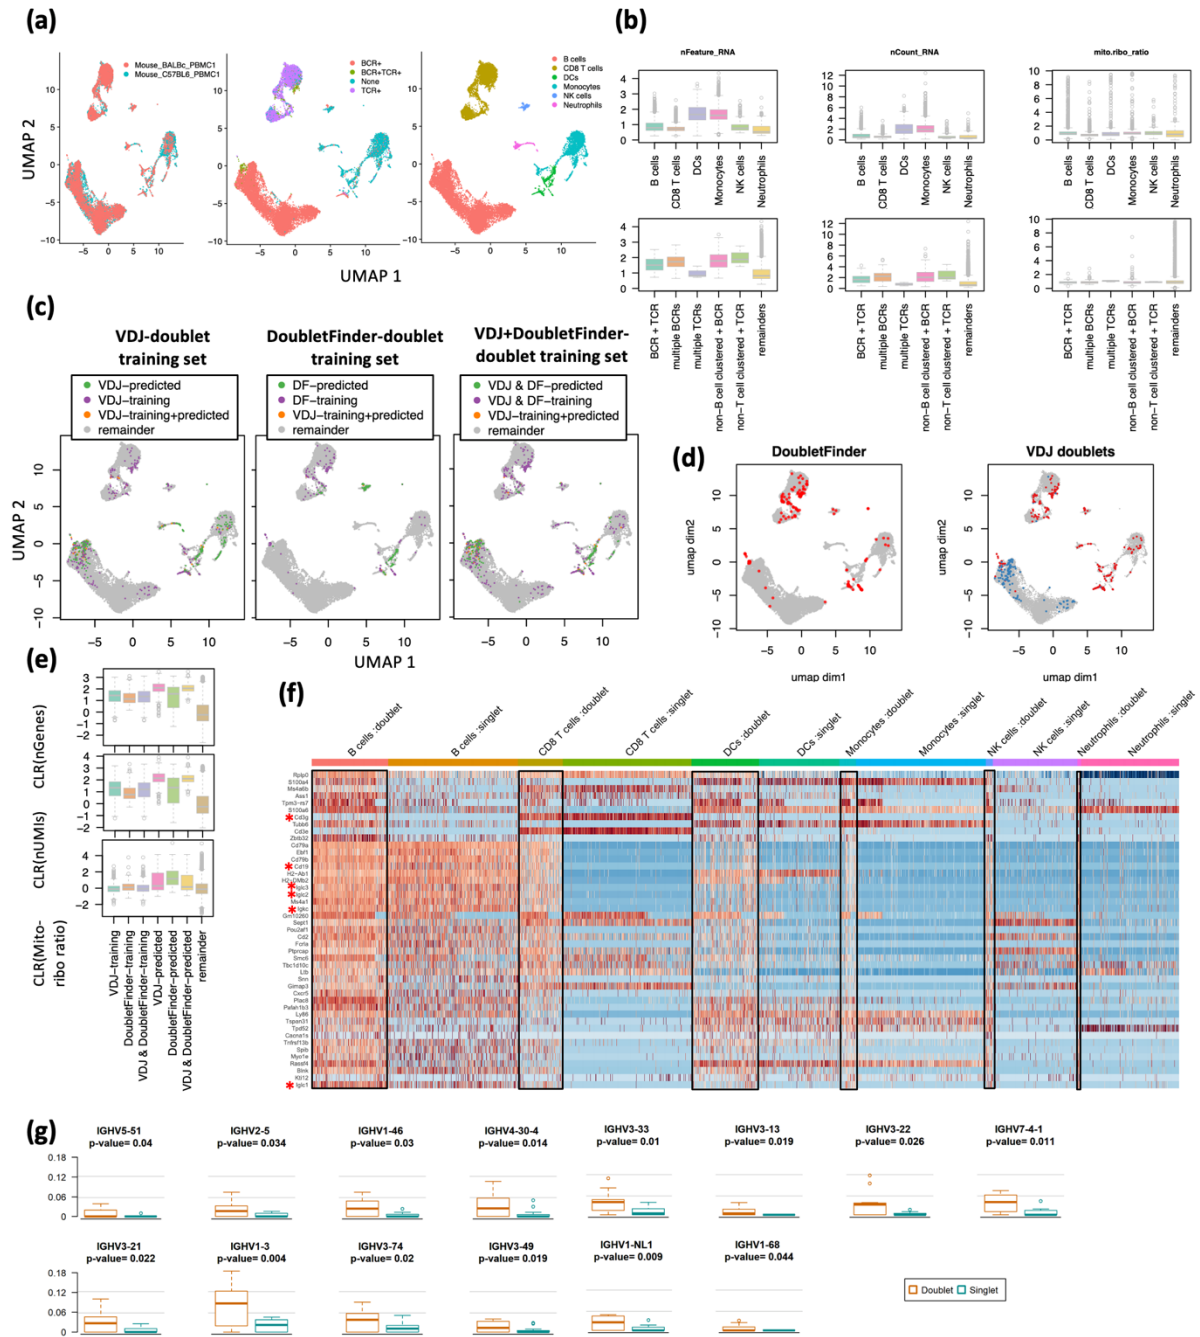

**Figure S4. MLtiplet training features and predictions from a murine PBMC dataset.**

**Related to Figure 4.**

Doublet detection on a murine dataset comprising PBMCs from two mouse strains (BALB/c and C57BL/6). (a) UMAP plots of (left) each mouse sample, (middle) VDJ-seq information, and (right) the annotated cell types. (b) The relative numbers of genes (nFeatures), RNA molecules (nUMI) and mito-ribo ratio (mitoribo\_ratio) per cell for (top) each cell type, and (bottom) the VDJ-identified doublets/multiplets. (c) UMAP plot of the doublets identified from (left) DoubletFinder and (right) VDJ-seq heterotypic doublets. (d) The relative numbers of genes (nFeatures), RNA molecules (nUMI) and mito-ribo ratio (mitoribo\_ratio) per cell for the VDJ-identified doublets/multiplets, DoubletFinder-identified doublets/multiplets, MLtiplet predicted doublets/multiplets and the remainder (predicted singlets by MLtiplet). (e) UMAP plots of the training and predicted doublets/multiplets using each approach. (f) Heatmap of differential gene expression between murine PBMC between predicted singlets and doublets/multiplets per cell type cluster. (g) Enrichment of IGHV gene usages between doublets and singlets in three healthy peripheral blood samples. Tests performed by MANOVA in R.
